# Supplementary material for: Surfactant-assisted synthesis of zero-dimensional iron nanomaterial for cellobiose hydrolysis
Source: Royal Society of Chemistry journal article supplement (doi:10.1039/d3ma00588g), 2023-11-09
Supplement: d3ma00588g1.pdf [file d3ma00588g1.pdf]

## Electronic Supplementary Immaterial (ESI)

### Synthesis of surfactant assisted zero-dimensional iron nanomaterials for cellobiose hydrolysis

#### A Table of content entry

Table S1: Comparing results of few different nanomaterials synthesized using the same method for cellobiose hydrolysis at 120 °C

| Nanomaterials     | Calcination temp/°C | %Conversion | %Yield of Glucose | %Yield of HMF |
|-------------------|---------------------|-------------|-------------------|---------------|
| FeCl <sub>3</sub> | 400                 | 40          | 40                | -             |
| FeCTB-200         | 200                 | 50          | 50                | 50            |
| FeCTB-300         | 300                 | 60          | 60                | 40            |
| FeCTB             | 400                 | 80          | 40                | 60            |

Table S2: Hydrolysis of cellobiose over FeCTB nanomaterial at different temperature

| Nanomaterials | Reaction temperature /°C | %Conversion | %Yield of Glucose | %Yield of HMF |
|---------------|--------------------------|-------------|-------------------|---------------|
| FeCTB         | 120                      | 80          | 40                | 60            |
| FeCTB         | 200                      | 80          | 30                | 70            |
| FeCTB         | 250                      | 85          | 30                | 70            |

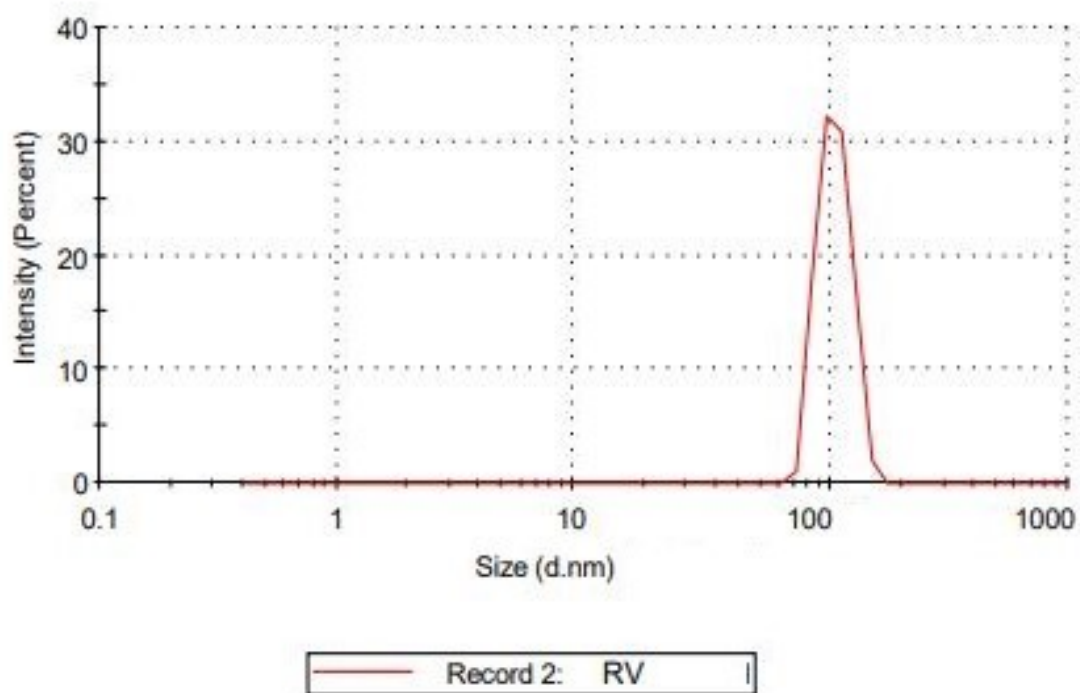

Fi

Figure S1: Particle size distribution of FeCTB by dynamics light scattering (DLS)

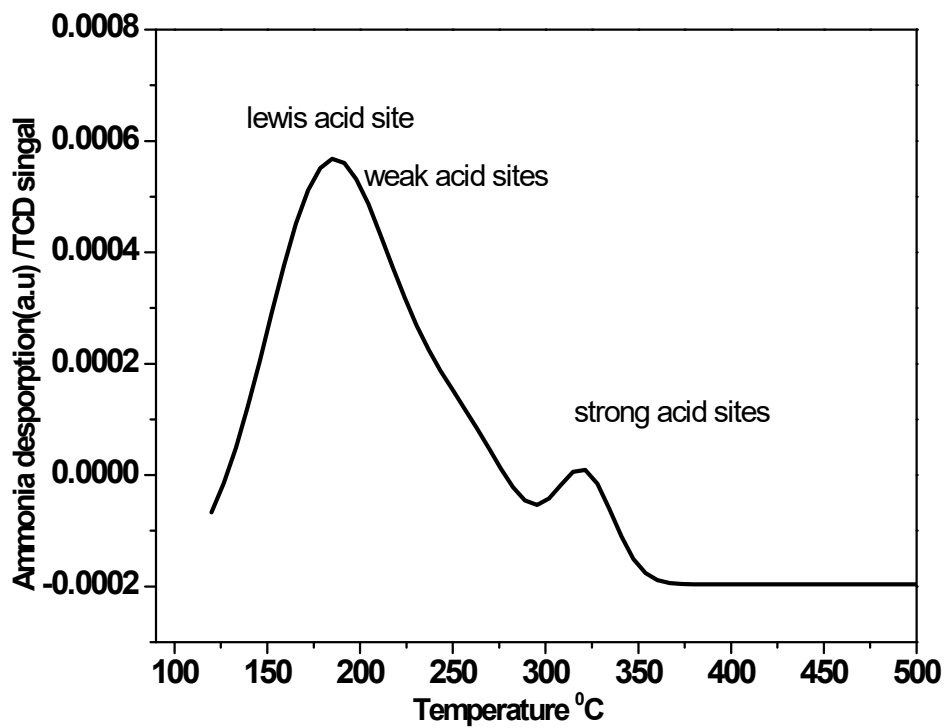

Figure S2: Ammonia Temperature Program Desorption (NH<sub>3</sub>-TPD) of FeCTB up 600 °C.

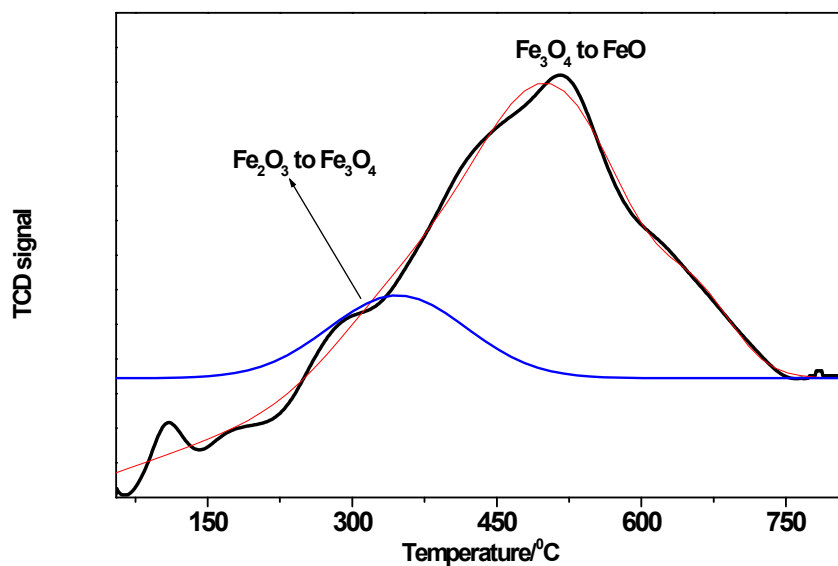

Figure S3: The H<sub>2</sub>-TPR profile of FeCTB nanomaterial up 800 °C.

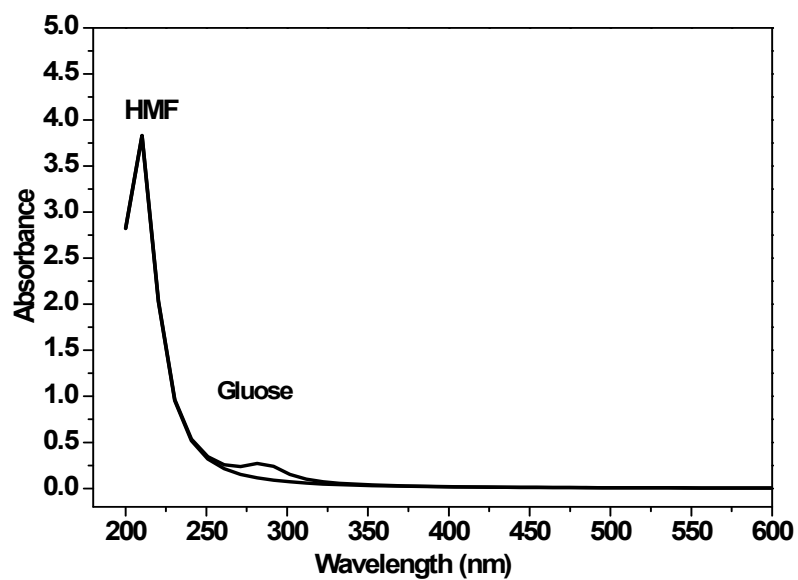

Figure S4: The UV-Visible spectrum of hydrolyzed product of cellobiose
